# Supplementary material for: Giant energy storage efficiency and high recoverable energy storage density achieved in K0.5Na0.5NbO3-Bi(Zn0.5Zr0.5)O3 ceramics
Source: Royal Society of Chemistry journal article supplement (doi:10.1039/d0tc01711f), 2020-01-01
Supplement: d0tc01711f1.pdf [file d0tc01711f1.pdf]

## Supplementary Materials:

### **Giant energy storage efficiency and high recoverable energy storage density achieved in $\text{K}_{0.5}\text{Na}_{0.5}\text{NbO}_3\text{-Bi}(\text{Zn}_{0.5}\text{Zr}_{0.5})\text{O}_3$ ceramics**

Miao Zhang,<sup>a</sup> Haibo Yang,<sup>a,\*</sup> Da Li,<sup>a</sup> Liang Ma,<sup>b</sup> Ying Lin<sup>a,\*</sup>

<sup>a</sup> Shaanxi Key Laboratory of Green Preparation and Functionalization for Inorganic Materials, School of Materials Science and Engineering, Shaanxi University of Science and Technology, Xi'an 710021, China

<sup>b</sup> Xianyang Non-metallic Mineral R & D Institute Co.,Ltd., Xianyang 712021, China

\* Corresponding Authors

(Haibo Yang\*) Email: yanghaibo@sust.edu.cn

(Ying Lin\*) Email: linying\_333@163.com

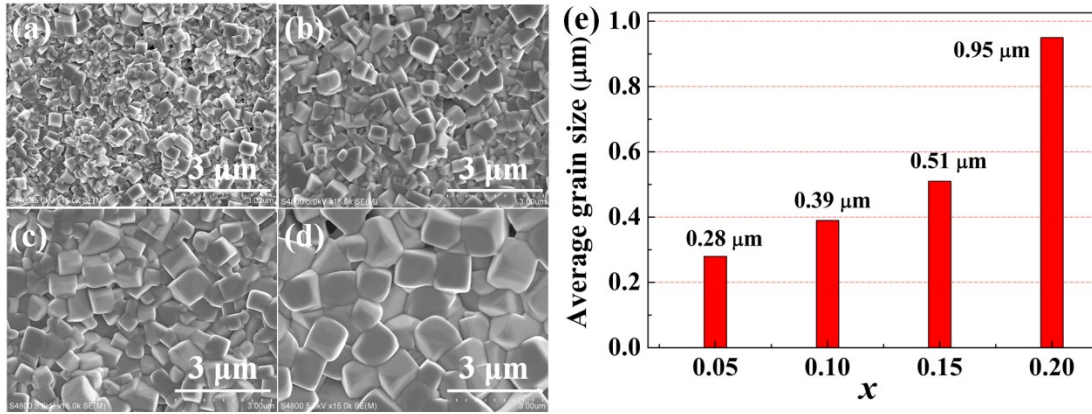

Fig. S1 SEM of (1-x)KNN-xBZZ ceramics (a)  $x=0.05$ ; (b)  $x=0.10$ ; (c)  $x=0.15$ ; (d)  $x=0.20$ . (e) average grain sizes of (1-x)KNN-xBZZ ceramics.

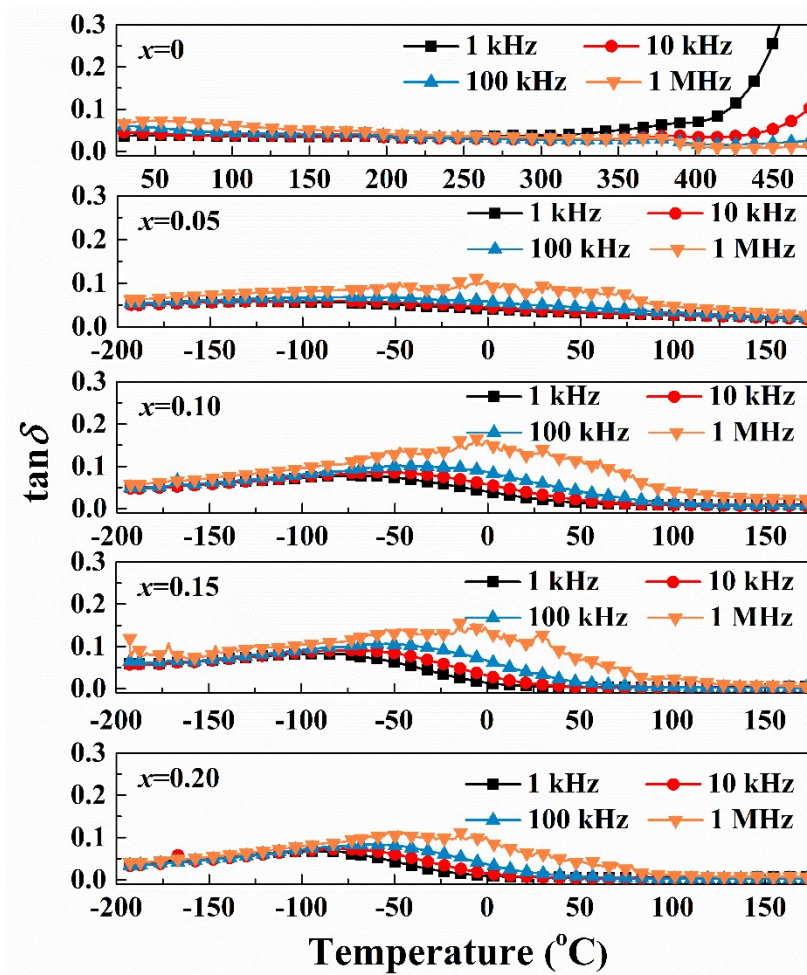

Fig. S2 Temperature dependence of dielectric loss ( $\tan\delta$ ) of (1-x)KNN-xBZZ ceramics.

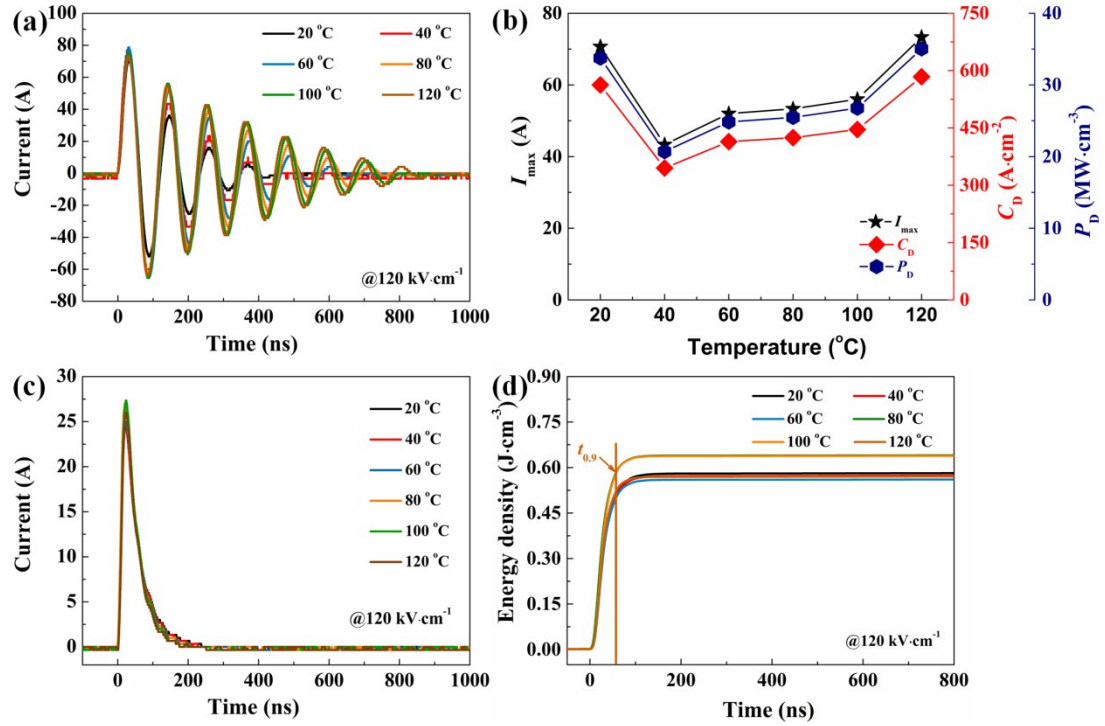

Fig. S3 (a) Underdamped discharge waveforms of the 0.85KNN-0.15BZZ ceramic measured over a temperature range from 20 to 120 °C. (b) Variations in the  $I_{\max}$ ,  $C_D$  and  $P_D$  values as functions of temperature. (c) Overdamped discharge current curves of the 0.85KNN-0.15BZZ ceramic at different temperatures at 120 kV·cm<sup>-1</sup>. (d) Relationship between energy density ( $W_d$ ) and time ( $t$ ).
